# Impacts of CA9 Gene Polymorphisms on Urothelial Cell Carcinoma Susceptibility and Clinicopathologic Characteristics in Taiwan

Shian-Shiang Wang<sup>1,2,3</sup>, Yu-Fan Liu<sup>3,4</sup>, Yen-Chuan Ou<sup>2</sup>, Chuan-Shu Chen<sup>2</sup>, Jian-Ri Li<sup>2</sup>, Shun-Fa Yang<sup>1,4\*</sup>

**1** Institute of Medicine, Chung Shan Medical University, Taichung, Taiwan, **2** Division of Urology, Department of Surgery, Taichung Veterans General Hospital, Taichung, Taiwan, **3** Department of Biomedical Sciences, Chung Shan Medical University, Taichung, Taiwan, **4** Department of Medical Research, Chung Shan Medical University Hospital, Taichung, Taiwan

## Abstract

**Background:** Carbonic anhydrase 9 (CA9) is reportedly overexpressed in several types of carcinomas and is generally considered a marker of malignancy. The current study explored the effect of CA9 gene polymorphisms on the susceptibility of developing urothelial cell carcinoma (UCC) and the clinicopathologic status.

**Methodology and Principal Findings:** A total of 442 participants, including 221 healthy people and 221 patients with UCC, were recruited for this study. Four single-nucleotide polymorphisms (SNPs) of the CA9 gene were assessed by a real-time PCR with the TaqMan assay. After adjusting for other co-variants, the individuals carrying at least one A allele at CA9 rs1048638 had a 2.303-fold risk of developing UCC than did wild-type (CC) carriers. Furthermore, UCC patients who carried at least one A allele at rs1048638 had a higher invasive stage risk ( $p < 0.05$ ) than did patients carrying the wild-type allele. Moreover, among the UCC patients with smoker, people with at least one A allele of CA9 polymorphisms (rs1048638) had a 4.75-fold (95% CI = 1.204–18.746) increased risk of invasive cancer.

**Conclusion:** The rs1048638 polymorphic genotypes of CA9 might contribute to the prediction of susceptibility to and pathological development of UCC. This is the first study to provide insight into risk factors associated with CA9 variants in carcinogenesis of UCC in Taiwan.

**Citation:** Wang S-S, Liu Y-F, Ou Y-C, Chen C-S, Li J-R, et al. (2013) Impacts of CA9 Gene Polymorphisms on Urothelial Cell Carcinoma Susceptibility and Clinicopathologic Characteristics in Taiwan. PLoS ONE 8(12): e82804. doi:10.1371/journal.pone.0082804

**Editor:** Chih-Hsin Tang, China Medical University, Taiwan

**Received:** October 11, 2013; **Accepted:** November 5, 2013; **Published:** December 13, 2013

**Copyright:** © 2013 Wang et al. This is an open-access article distributed under the terms of the Creative Commons Attribution License, which permits unrestricted use, distribution, and reproduction in any medium, provided the original author and source are credited.

**Funding:** This study was supported by a research grant from National Science Council, Taiwan (NSC 96-2628-B-040-021-MY3). The funders had no role in the study design, data collection and analysis, decision to publish, or preparation of the manuscript.

**Competing Interests:** The authors have declared that no competing interests exist.

\* E-mail: ysf@csmu.edu.tw

These authors contributed equally to this work.

## Introduction

Urothelium covers the epithelial lining of the urinary tract from the renal calyces to the bladder. Any neoplastic lesion grew from the urothelium has similar behavior [1]. The most frequent malignant tumor of urinary tract is urothelial cell carcinoma (UCC). In the United State, bladder cancer is the fourth most common cancer among men [2] and bladder cancer is the second most genitourinary cancer. In Taiwan, bladder cancer is the ninth leading malignancy among men and the sixteenth leading malignancy among women [3]. UCC composed more than 90% of bladder cancer in both genders. The incidence of upper urinary tract UCC is also increasing. The most known risk factors are tobacco use and aromatic amines exposure [4–6]. However, many articles emphasized the importance of genetic factors in the development of UCC [7–10]. Genetic variation affects the function of oncogene, tumor suppressor gene or metabolism of enzyme to induce cancer formation. Hypoxia is the common cause of tumor [11]. Decreased O<sub>2</sub> concentration created a hostile metabolic microenvironment (e.g., existence of severe tissue

acidosis) to activate a variety of biological responses including signal pathways of proliferation, angiogenesis and death [11]. Tumor cells can survive and even grow under hypoxic condition. Tumor hypoxia is associated with aggressive tumor growth, metastasis, and treatment failure after radiation therapy and chemotherapy [12]. Hypoxia might be an important therapeutic target because it involved many different metabolic pathways in cancer growth.

Carbonic anhydrase (CA), a family of zinc metalloenzymes, can efficiently catalyze the reversible processes of hydration-dehydration of CO<sub>2</sub> and HCO<sub>3</sub><sup>-</sup>. Carbonic anhydrase 9 (CA9) is located on chromosome 9p12–13, which comprises 11 exons and encodes for the 459-amino-acid protein. CA9 helps to keep a normal pH in tumor cells in a hypoxic microenvironment and allow tumor cell proliferation [13]. CA9, which is not expressed in most benign tissues, is abundant in many cancers including renal cancer, bladder cancer, oral cancer, lung cancer and uterine cancer and has been thought to be an endogenous marker for tumor hypoxia [13–20]. Single nucleotide polymorphism (SNP) is a variation in the DNA sequence that occurs when a nucleotide (A, T, C, or G) is

changed in at least 1% of a certain population [13]. Previous study showed that SNP in the exon region of CA9 are associated with overall survival for metastatic renal cell carcinoma [21] and gene-environment interactions of CA9 polymorphisms, smoking, and betel quid chewing might alter oral cancer susceptibility and metastasis [13]. One published report suggests a tripartite role of CA9 as a diagnostic, prognostic, and therapeutic molecular marker in bladder cancer [16]. However, no reports focused on the association between CA9 gene polymorphisms and UCC. The present study investigated relationships between SNPs (rs2071676, rs3829078, and 376del393) in the exon and 3'-UTR (rs1048638) regions of the CA9 gene and the risk of UCC. The influences of these SNPs combined with tobacco consumption on clinicopathological characteristics of UCC were also evaluated. To our knowledge, this is the first study to demonstrate a significant association between CA9 gene polymorphisms and UCC.

## Materials and Methods

### Subjects and Specimen Collection

We recruited 221 patients (139 men and 82 women, with a mean age of 68.52 years) at Taichung Veterans General Hospital in Taichung, Taiwan. Patients were enrolled as a case group in 2011–2012. All patients have pathology proved urothelial cell carcinoma of upper urinary tract or bladder. Meanwhile, during the same study period, 221 age- and gender-matched individuals were enrolled as the controls that entered the physical examination at the same hospital. These control groups had neither self-reported history of cancer of any sites. Personal information and characteristics collected from the study subjects using interviewer-administered questionnaires contained questions involving demographic characteristics and the status of cigarette smoking. Before commencement of this study, approval was obtained from the Institutional Review Board (IRB) of Taichung Veterans General Hospital, and informed written consent to participate in the study was obtained from each person (IRB No. CF11094). For both cases and controls, we used a questionnaire to obtain information on patient exposure to tobacco consumption. Medical information for the cases was obtained from their medical records, and included TNM clinical staging, lymph node involvement, and histologic grade. UCC patients were clinically staged at the time of diagnosis according to the TNM staging system of the American Joint Committee on Cancer (AJCC) Staging Manual (7th ed.) Tumors are classified as superficial tumor (pT0-1, n = 138) and invasive tumor (pT2-4, n = 83). Metastasis into lymph nodes was detected in 11 cases (6.1%) and one patient has distal metastasis (0.6%). Whole-blood specimens collected from controls and UCC patients were placed in tubes containing ethylenediaminetetraacetic acid (EDTA), immediately centrifuged, and stored at  $-80^{\circ}\text{C}$  [22].

### Genomic DNA extraction

Genomic DNA was extracted using QIAamp DNA blood mini kits (Qiagen, Valencia, CA, USA) following the manufacturer's instructions. We dissolved DNA in TE buffer (10 mM Tris and 1 mM EDTA; pH 7.8) and then quantified it by measuring the OD260. The final preparation was stored at  $-20^{\circ}\text{C}$  and was used to act as templates for the polymerase chain reaction (PCR) [23].

### Real-time PCR

Allelic discrimination of the CA9 +201 (rs2071676), +1081 (rs3829078) and +1584 (rs1048638) allelic polymorphisms were assessed with an ABI StepOne™ Real-Time PCR System (Applied Biosystems, Foster City, CA, USA), and analyzed with

SDS vers. 3.0 software (Applied Biosystems) using the TaqMan assay [24]. Furthermore, the 376del393 allelic polymorphisms were assessed with PCR. The products were separated on a 3% agarose gel and then stained with ethidium bromide [25]. The final volume for each reaction was 5  $\mu\text{L}$ , containing 2.5  $\mu\text{L}$  TaqMan Genotyping Master Mix, 0.125  $\mu\text{L}$  TaqMan probe mix, and 10 ng genomic DNA. The real-time PCR included an initial denaturation step at  $95^{\circ}\text{C}$  for 10 min, followed by 40 cycles at of  $95^{\circ}\text{C}$  for 15 s and then at  $60^{\circ}\text{C}$  for 1 min. For each assay, appropriate controls (nontemplate and known genotype) were included in each typing run to monitor reagent contamination and as a quality control. To validate results from real-time PCR, around 5% of assays were repeated and several cases of each genotype were confirmed by the DNA sequence analysis.

### Statistical analysis

Differences between the 2 groups were considered significant if  $p$  values were  $< 0.05$ . The Mann-Whitney  $U$ -test and Fisher's exact test were used to compare differences in distributions of patient demographic characteristics between the cancer-free (control) and UCC groups. The adjusted odds ratios (AORs) and 95% confidence intervals (CIs) of the association between genotype frequencies and risk plus clinicopathological characteristics were estimated using multiple logistic regression models, after controlling for other covariates. We analyzed all data with Statistical Analytic System (SAS Institute, Cary, NC, USA) software (vers. 9.1, 2005) for Windows.

## Results

The distributions of demographic characteristics showed no significant differences in age, gender and tobacco consumption between UCC patients and controls (Table 1). The study population was Taiwanese with male predominant (62.9%) and a low proportion of smokers (25.3% in control and 28.5% in UCC group). In our recruited control group, the frequencies of CA9 rs2071676 ( $\chi^2$  value: 1.16), rs3829078 ( $\chi^2$  value: 0.31), rs1048638 ( $\chi^2$  value: 0.09), and 376del393 ( $\chi^2$  value: 1.75) were in Hardy-Weinberg equilibrium, respectively. Distribution of CA9 genotypes in Table 2 revealed the most frequent alleles were heterozygous A/G for the +201 (rs2071676) locus and homozygous for A/A, C/C, and Ins/Ins, respectively, for the +1081 (rs3829078), +1584 (rs1048638), and +376 (376del393) loci. We estimated the adjusted odds ratio (AORs) with 95% confidence interval (CIs) by multiple logistic regression models with adjustment for age, gender and tobacco consumption to diminish the possible interferences.

Study subjects carrying the C/A genotype of the rs1048638 polymorphism had a significantly increased UCC risk of 2.217 (95% CI = 1.169–4.207, Table 2). Compared to C/C genotype of the rs1048638, C/A+A/A genotype also demonstrated higher UCC risk of 2.303 (95% CI = 1.227–4.320). There were no significant increased UCC risk could be found in the polymorphisms of the other three loci rs2071676, rs3829078 and 376del393. Considering cancer stage, UCC patients with the polymorphism of rs1048638 C/A+AA genotype had significantly increased invasive cancer risk of 2.259 (95% CI = 1.136–4.490, Table 3). The data also showed the trend of C/A+A/A genotype patients to have more lymph node or distant metastasis risk. However, no statistical significance could be demonstrated. Among the UCC patients with C/A+A/A genotype of the rs1048638, compared to C/C genotype, smoking increased the invasive cancer risk of 4.750 (95% CI = 1.204–18.746, Table 4).

**Table 1.** The distributions of demographical characteristics in 221 controls and 221 patients with urothelial cell carcinoma.

| Variable                       | Controls<br>(N = 221) | Patients<br>(N = 221) | p value   |
|--------------------------------|-----------------------|-----------------------|-----------|
| <b>Age (yrs)</b>               | <b>Mean ± S.D.</b>    | <b>Mean ± S.D.</b>    |           |
|                                | 67.85±8.52            | 68.52±11.79           | P = 0.488 |
| <b>Gender</b>                  | <b>n (%)</b>          | <b>n (%)</b>          |           |
| Male                           | 139 (62.9%)           | 139 (62.9%)           |           |
| Female                         | 82 (37.1%)            | 82 (37.1%)            | p = 1.000 |
| <b>Tobacco consumption</b>     |                       |                       |           |
| No                             | 165 (74.7%)           | 158 (71.5%)           |           |
| Yes                            | 56 (25.3%)            | 63 (28.5%)            | p = 0.453 |
| <b>Stage</b>                   |                       |                       |           |
| Superficial tumor (pTa–pT1)    |                       | 138 (62.4%)           |           |
| Invasive tumor (pT2–pT4)       |                       | 83 (37.6%)            |           |
| <b>Tumor T status</b>          |                       |                       |           |
| T0                             |                       | 64 (29.0%)            |           |
| T1–T4                          |                       | 157 (71.0%)           |           |
| <b>Lymph node status</b>       |                       |                       |           |
| N0                             |                       | 204 (92.3%)           |           |
| N1+N2                          |                       | 17 (7.7%)             |           |
| <b>Metastasis</b>              |                       |                       |           |
| M0                             |                       | 218 (98.6%)           |           |
| M1                             |                       | 3 (1.4%)              |           |
| <b>Histopathologic grading</b> |                       |                       |           |
| Low grade                      |                       | 34 (15.4%)            |           |
| High grade                     |                       | 187 (84.6%)           |           |

Mann-Whitney U test or Fisher's exact test was used between healthy controls and patients with urothelial cell carcinoma.

## Discussion

In the current study, we try to find the association between *CA9* gene polymorphisms and clinicopathological characteristics of UCC. The results showed that patients carrying the C/A genotype of the rs1048638 (3'-UTR regions of the *CA9* gene) polymorphism had a significantly increased UCC risk of 2.217 (95% CI = 1.169–4.207). Compared to C/C genotype of the rs1048638, C/A+A/A genotype demonstrated higher UCC risk of 2.303 (95% CI = 1.227–4.320). To consider the tumor invasiveness, patients with C/A+A/A genotype of the rs1048638 polymorphism demonstrated a significant higher invasive cancer (pT2–T4) risk of 2.259 (95% CI = 1.136–4.490).

*CA9* is abundant in cancers but not in most benign tissues. It helps tumor cells to survive and proliferate in a hypoxic condition [13,21]. The expression of *CA9* gene was markedly induced under hypoxic conditions in tumor cells and *CA9* may maintain extracellular acidic pH in microenvironment and help cancer cells grow and metastasize [20]. It was reported that *CA9* as a marker of hypoxia and it is also associated with the tumor grade, metastasis and patients prognosis [15,16]. *CA9* expression is associated with poor prognosis in many human tumors, and may contribute to aggressive cancer phenotype [17]. In non-small cell

lung cancer, the *CA9* up-regulation occurs in highly hypoxic/necrotic regions of the tumors and *CA9* expression is strongly associated with poor outcome through the mechanism of angiogenesis, apoptosis inhibition, and cell-cell adhesion disruption [19]. In high risk, early stage cervical cancer, *CA9* is an independent prognostic factor for both progression free survival and overall survival [26]. Furthermore, it was reported that high expression of *CA9* was more frequent with advanced stage in several kinds of solid tumors including bladder cancer [16,27,28]. In the present study, a significantly higher distribution frequency of Invasive tumor stage was exhibited in UCC patients with at least 1 polymorphic A allele of *CA9* rs1048638 compared to those with the WT genotype (Table 3). The rs1048638 polymorphism is known in the noncoding 3'-UTR, and as such may affect gene expression through microRNA-targeting sequences. However, the expression and function of *CA9* which are affected by this SNP are still unconfirmed. Detailed relevant mechanisms may warrant further studies.

*CA9* reflects significant changes in tumor biology and decreased *CA9* concentration is independently associated with poor survival in advanced renal cell carcinoma. *CA9* can be used to predict clinical outcome in such high risk kidney cancer patients who need adjuvant immunotherapy and *CA9* targeted therapies [27]. *CA9* also links to poor vascularization and resistance of chemoradiotherapy in head and neck cancer [28] and is associated with reduced overall survival and disease-free survival [29]. Alexander et al [30] review researches of *CA9* in renal cell carcinoma (RCC) and conclude it can improve diagnostic accuracy and is an attractive target image of and therapy for clear cell RCC. *CA9* expression is suggested to be a strong predictor of recurrence, progression, and overall survival of bladder cancer patients because it was expressed differentially in noninvasive versus invasive tumors, in low-grade versus high-grade bladder cancer, and in primary tumors versus metastases [16].

Alternation of genome can change the cellular phenotype to evolve from a preneoplastic stage into cancer [31]. It is clear that genetics play an important role in carcinogenesis. SNP may influence gene expression, messenger RNA stability and subcellular localization of mRNAs and/or proteins to produce disease [32]. *CA9* SNP patients with metastatic clear cell renal cell carcinoma may be associated with better survival and a greater opportunity to respond to interleukin-2 [21]. It is also reported that *CA9* gene polymorphisms, smoking and betel-quid chewing might alter oral cancer susceptibility and metastasis [13]. Increasing evidences suggest gene polymorphism is associated with the risk and progression of UCC [10,33–40] and can be considered as a prognostic factor of chemoradiotherapy [41]. Cigarette smoking is the most important risk factor for bladder cancer [42]. The present study showed patients with the rs1048638 (3'-UTR regions of the *CA9* gene) polymorphism had increased risk of UCC and invasive cancer stage (Table 2 and Table 3). Smoking can increase the risk of invasive cancer in the *CA9* SNP UCC patients (Table 4). These lines of evidence suggest that genetic factor and environmental carcinogen exposure were involved in the formation or pathogenesis of UCC.

The study still has some limitations. Firstly, the sample size was small; the statistical significance should be interpreted carefully. Secondly, patients cannot provide detail history of Chinese herbs usage or aromatic amines exposure that might cause bias. We observed the *CA9* SNPs affected the clinical behavior of UCC but how this SNP influenced the *CAIX* expression was still unknown.

In conclusion, this is the first report to study the association between *CA9* SNP and UCC risk. The patients carrying the C/A genotype of the rs1048638 of the *CA9* gene polymorphism had a

**Table 2.** Distribution frequency of CA9 genotypes in 221 controls and 221 patients with urothelial cell carcinoma.

| Variable         | Controls (N=221) n (%) | Patients (N=221) n (%) | OR (95% CI)                 | AOR (95% CI)                |
|------------------|------------------------|------------------------|-----------------------------|-----------------------------|
| <b>rs2071676</b> |                        |                        |                             |                             |
| AA               | 59 (26.7%)             | 60 (27.1%)             | 1.00                        | 1.00                        |
| AG               | 104 (47.1%)            | 102 (46.2%)            | 0.964 (0.614–1.515)         | 0.990 (0.589–1.665)         |
| GG               | 58 (26.2%)             | 59 (26.7%)             | 1.000 (0.600–1.666)         | 0.987 (0.539–1.809)         |
| AG+GG            | 162 (73.3%)            | 161 (72.9%)            | 0.977 (0.642–1.488)         | 0.989 (0.608–1.609)         |
| <b>rs3829078</b> |                        |                        |                             |                             |
| AA               | 205 (92.8%)            | 204 (92.3%)            | 1.00                        | 1.00                        |
| AG               | 16 (7.2%)              | 17 (7.7%)              | 1.068 (0.525–2.171)         | 0.793 (0.344–1.828)         |
| GG               | 0 (0%)                 | 0 (0%)                 | --                          | --                          |
| AG+GG            | 16 (7.2%)              | 17 (7.7%)              | 1.068 (0.525–2.171)         | 0.793 (0.344–1.828)         |
| <b>rs1048638</b> |                        |                        |                             |                             |
| CC               | 196 (88.7%)            | 180 (81.4%)            | 1.00                        | 1.00                        |
| CA               | 24 (10.9%)             | 38 (17.2%)             | 1.724 (0.995–2.987)         | <b>2.217 (1.169–4.207)*</b> |
| AA               | 1 (0.4%)               | 3 (1.4%)               | 3.267 (0.337–31.689)        | 4.716 (0.363–61.319)        |
| CA+AA            | 25 (11.3%)             | 41 (18.6%)             | <b>1.786 (1.044–3.055)*</b> | <b>2.303 (1.227–4.320)*</b> |
| <b>376del393</b> |                        |                        |                             |                             |
| INS/INS          | 170 (76.9%)            | 165 (74.7%)            | 1.00                        | 1.00                        |
| INS/Del          | 50 (22.6%)             | 50 (22.6%)             | 1.030 (0.659–1.611)         | 0.921 (0.551–1.537)         |
| Del/Del          | 1 (0.5%)               | 6 (2.7%)               | 6.182 (0.736–51.905)        | 5.532 (0.558–54.844)        |
| INS/Del+ Del/Del | 51 (23.1%)             | 56 (25.3%)             | 1.131 (0.732–1.749)         | 1.062 (0.644–1.751)         |

The odds ratios (ORs) and with their 95% confidence intervals (CIs) were estimated by logistic regression models. The adjusted odds ratios (AORs) with their 95% confidence intervals (CIs) were estimated by multiple logistic regression models after controlling for age and gender. \* p value < 0.05 as statistically significant. doi:10.1371/journal.pone.0082804.t002

significantly increased UCC risk and invasive cancer risk. The synergistic effect of smoking and CA9 gene polymorphisms on the risk of invasive UCC is also demonstrated. Large-scale studies may

be required to verify the association between the SNP of hypoxia related gene such as CA9 and UCC risk.

**Table 3.** Distribution frequency of the clinical status and CA9 rs1048638 genotype frequencies in 221 patients with urothelial cell carcinoma.

| Variable                       | Genotypic frequencies |                     |                             | p value           |
|--------------------------------|-----------------------|---------------------|-----------------------------|-------------------|
|                                | CC (N=180) n (%)      | CA+ AA (N=41) n (%) | OR (95% CI)                 |                   |
| <b>Stage</b>                   |                       |                     |                             |                   |
| Superficial tumor (pTa–pT1)    | 119 (66.1%)           | 19 (46.3%)          | 1.00                        |                   |
| Invasive tumor (pT2–pT4)       | 61 (33.9%)            | 22 (53.7%)          | <b>2.259 (1.136–4.490)*</b> | <b>p = 0.018*</b> |
| <b>Tumor T status</b>          |                       |                     |                             |                   |
| T0                             | 53 (29.4%)            | 11 (26.8%)          | 1.00                        |                   |
| T1–T4                          | 127 (70.6%)           | 30 (73.2%)          | 1.138 (0.531–2.438)         | p = 0.739         |
| <b>Lymph node status</b>       |                       |                     |                             |                   |
| N0                             | 169 (93.9%)           | 35 (85.4%)          | 1.00                        |                   |
| N1+N2                          | 11 (6.1%)             | 6 (14.6%)           | 2.634 (0.913–7.596)         | p = 0.065         |
| <b>Metastasis</b>              |                       |                     |                             |                   |
| M0                             | 179 (99.4%)           | 39 (95.1%)          | 1.00                        |                   |
| M1                             | 1 (0.6%)              | 2 (4.9%)            | 2.463 (0.497–12.219)        | p = 0.065         |
| <b>Histopathologic grading</b> |                       |                     |                             |                   |
| Low grade                      | 27 (15.0%)            | 7 (17.1%)           | 1.00                        |                   |
| High grade                     | 153 (85.0%)           | 34 (82.9%)          | 0.857 (0.345–2.131)         | p = 0.740         |

doi:10.1371/journal.pone.0082804.t003

**Table 4.** Distribution frequency of the clinical status and CA9 rs1048638 genotype frequencies in 221 patients with urothelial cell carcinoma with non-smoker and smoker.

| Variable                       | Non-Smoking (n = 158) |                     |                     | Smoking (n = 63) |                     |                       | p value   | OR (95% CI) | p value    |
|--------------------------------|-----------------------|---------------------|---------------------|------------------|---------------------|-----------------------|-----------|-------------|------------|
|                                | CC (N=128 ) n (%)     | CA+AA (N=30 ) n (%) | n                   | CC (N=52 ) n (%) | CA+AA (N=11 ) n (%) | n                     |           |             |            |
| <b>Stage</b>                   |                       |                     |                     |                  |                     |                       |           |             |            |
| Superficial tumor (pTa–pT1)    | 81 (63.3%)            | 15 (50.0%)          | 1.00                | 38 (73.1%)       | 4 (36.4%)           | 1.00                  |           |             |            |
| Invasive tumor (pT2–pT4)       | 47 (36.7%)            | 15 (50.0%)          | 1.723 (0.774–3.839) | 14 (26.9%)       | 7 (63.6%)           | 4.750 (1.204–18.746)* | p = 0.180 |             | p = 0.023* |
| <b>Tumor T status</b>          |                       |                     |                     |                  |                     |                       |           |             |            |
| T0                             | 33 (25.8%)            | 8 (26.7%)           | 1.00                | 20 (38.5%)       | 3 (27.3%)           | 1.00                  |           |             |            |
| T1–T4                          | 95 (74.2%)            | 22 (73.3%)          | 0.955 (0.388–2.352) | 32 (61.5%)       | 8 (72.7%)           | 1.667 (0.395–7.033)   | p = 0.921 |             | p = 0.476  |
| <b>Lymph node status</b>       |                       |                     |                     |                  |                     |                       |           |             |            |
| N0                             | 120 (93.8%)           | 26 (86.7%)          | 1.00                | 49 (94.2%)       | 9 (81.8%)           | 1.00                  |           |             |            |
| N1+N2                          | 8 (6.3%)              | 4 (13.3%)           | 2.308 (0.646–8.241) | 3 (5.8%)         | 2 (18.2%)           | 2.634 (0.913–7.596)   | p = 0.187 |             | p = 0.166  |
| <b>Metastasis</b>              |                       |                     |                     |                  |                     |                       |           |             |            |
| M0                             | 128 (99.4%)           | 29 (96.7%)          | 1.00                | 51 (98.1%)       | 10 (90.9%)          | 1.00                  |           |             |            |
| M1                             | 0 (0%)                | 1 (3.3%)            | ----                | 1 (1.9%)         | 1 (9.1%)            | 5.100 (0.294–88.476)  | p = 0.067 |             | p = 0.283  |
| <b>Histopathologic grading</b> |                       |                     |                     |                  |                     |                       |           |             |            |
| Low grade                      | 16 (12.5%)            | 5 (16.7%)           | 1.00                | 11 (21.2%)       | 2 (18.2%)           | 1.00                  |           |             |            |
| High grade                     | 112 (87.5%)           | 25 (83.3%)          | 0.714 (0.239–2.133) | 41 (78.8%)       | 9 (81.8%)           | 1.207 (0.227–6.416)   | p = 0.545 |             | p = 0.823  |

doi:10.1371/journal.pone.0082804.t004

## Author Contributions

Conceived and designed the experiments: SSW SFY. Performed the experiments: YFL SFY. Analyzed the data: SSW SFY. Contributed

reagents/materials/analysis tools: SSW YCO CSC JRL. Wrote the paper: SSW SFY.

## References

- Sagalowsky AI, Jarrett TW, Flanigan RC (2011) Urothelial Tumors of the Upper Urinary Tract and Ureter. Wein: Campbell-Walsh Urology. pp. 1526.
- Jacobs BL, Lee CT, Montie JE (2010) Bladder cancer in 2010: how far have we come? *CA Cancer J Clin* 60: 244–272.
- Health Do (2010) Cancer Registry Annal Report, Taiwan.
- Colin P, Koenig P, Ouzzane A, Berthon N, Villers A, et al. (2009) Environmental factors involved in carcinogenesis of urothelial cell carcinomas of the upper urinary tract. *BJU Int* 104: 1436–1440.
- Stern MC, Lin J, Figueroa JD, Kelsey KT, Kiltie AE, et al. (2009) Polymorphisms in DNA repair genes, smoking, and bladder cancer risk: findings from the international consortium of bladder cancer. *Cancer Res* 69: 6857–6864.
- Rouissi K, Stambouli N, Marrakchi R, Slama MR, Cherif M, et al. (2011) Smoking and polymorphisms in folate metabolizing genes and their effects on the histological stage and grade for bladder tumors. *Bull Cancer* 98: E1–10.
- Wang L, Wang G, Lu C, Feng B, Kang J (2012) Contribution of the -160C/A polymorphism in the E-cadherin promoter to cancer risk: a meta-analysis of 47 case-control studies. *PLoS One* 7: e40219.
- Guirado M, Gil H, Saenz-Lopez P, Reinboth J, Garrido F, et al. (2012) Association between C13ORF31, NOD2, RIPK2 and TLR10 polymorphisms and urothelial bladder cancer. *Hum Immunol* 73: 668–672.
- Wang YH, Yeh SD, Shen KH, Shen CH, Tung MC, et al. (2011) Association of hOGG1 and XPD polymorphisms with urothelial carcinoma in Taiwan. *Anticancer Res* 31: 3939–3944.
- Wang YH, Chiou HY, Lin CT, Hsieh HY, Wu CC, et al. (2009) Association between survivin gene promoter -31 C/G polymorphism and urothelial carcinoma risk in Taiwanese population. *Urology* 73: 670–674.
- Vaupel P, Kallinowski F, Okunieff P (1989) Blood flow, oxygen and nutrient supply, and metabolic microenvironment of human tumors: a review. *Cancer Res* 49: 6449–6465.
- Harris AL (2002) Hypoxia—a key regulatory factor in tumour growth. *Nat Rev Cancer* 2: 38–47.
- Chien MH, Yang JS, Chu YH, Lin CH, Wei LH, et al. (2012) Impacts of CA9 gene polymorphisms and environmental factors on oral-cancer susceptibility and clinicopathologic characteristics in Taiwan. *PLoS One* 7: e51051.
- Brockton NT, Klimowicz AC, Bose P, Petrillo SK, Konno M, et al. (2012) High stromal carbonic anhydrase IX expression is associated with nodal metastasis and decreased survival in patients with surgically-treated oral cavity squamous cell carcinoma. *Oral Oncol* 48: 615–622.
- Genega EM, Ghebremichael M, Najarian R, Fu Y, Wang Y, et al. (2010) Carbonic anhydrase IX expression in renal neoplasms: correlation with tumor type and grade. *Am J Clin Pathol* 134: 873–879.
- Klatte T, Seligson DB, Rao JY, Yu H, de Martino M, et al. (2009) Carbonic anhydrase IX in bladder cancer: a diagnostic, prognostic, and therapeutic molecular marker. *Cancer* 115: 1448–1458.
- Potter CP, Harris AL (2003) Diagnostic, prognostic and therapeutic implications of carbonic anhydrases in cancer. *Br J Cancer* 89: 2–7.
- Hedley D, Pintilie M, Woo J, Morrison A, Birle D, et al. (2003) Carbonic anhydrase IX expression, hypoxia, and prognosis in patients with uterine cervical carcinomas. *Clin Cancer Res* 9: 5666–5674.
- Giatromanolaki A, Koukourakis MI, Sivridis E, Pastorek J, Wykoff CC, et al. (2001) Expression of hypoxia-inducible carbonic anhydrase-9 relates to angiogenic pathways and independently to poor outcome in non-small cell lung cancer. *Cancer Res* 61: 7992–7998.
- Ivanov S, Liao SY, Ivanova A, Danilkovitch-Miagkova A, Tarasova N, et al. (2001) Expression of hypoxia-inducible cell-surface transmembrane carbonic anhydrases in human cancer. *Am J Pathol* 158: 905–919.
- de Martino M, Klatte T, Seligson DB, LaRochelle J, Shuch B, et al. (2009) CA9 gene: single nucleotide polymorphism predicts metastatic renal cell carcinoma prognosis. *J Urol* 182: 728–734.
- Wu CS, Yen CJ, Chou RH, Li ST, Huang WC, et al. (2012) Cancer-associated carbohydrate antigens as potential biomarkers for hepatocellular carcinoma. *PLoS One* 7:e39466.
- Yu YL, Yu SL, Su KJ, Wei CW, Jian MH, et al. (2010) Extended O6-methylguanine methyltransferase promoter hypermethylation following n-butylideneephthalide combined with 1,3-bis(2-chloroethyl)-1-nitrosourea (BCNU) on inhibition of human hepatocellular carcinoma cell growth. *J Agric Food Chem* 58: 1630–8.
- Yu YL, Su KJ, Chen CJ, Wei CW, Lin CJ, et al. (2012) Synergistic anti-tumor activity of isochailulactone and paclitaxel on human lung cancer cells. *J Cell Physiol* 227:213–222.
- Wei CW, Lin CC, Yu YL, Lin CY, Lin PC, et al. (2009) n-Butylideneephthalide induced apoptosis in the A549 human lung adenocarcinoma cell line by coupled down-regulation of AP-2alpha and telomerase activity. *Acta Pharmacol Sin* 30: 1297–306.
- Liao SY, Darcy KM, Randall LM, Tian C, Monk BJ, et al. (2010) Prognostic relevance of carbonic anhydrase-IX in high-risk, early-stage cervical cancer: a Gynecologic Oncology Group study. *Gynecol Oncol* 116: 452–458.
- Bui MH, Seligson D, Han KR, Pantuck AJ, Dorey EJ, et al. (2003) Carbonic anhydrase IX is an independent predictor of survival in advanced renal clear cell carcinoma: implications for prognosis and therapy. *Clin Cancer Res* 9: 802–811.
- Koukourakis MI, Giatromanolaki A, Sivridis E, Simopoulos K, Pastorek J, et al. (2001) Hypoxia-regulated carbonic anhydrase-9 (CA9) relates to poor vascularization and resistance of squamous cell head and neck cancer to chemoradiotherapy. *Clin Cancer Res* 7: 3399–3403.
- Peridis S, Pilgrim G, Athanasopoulos I, Parpounas K (2011) Carbonic anhydrase-9 expression in head and neck cancer: a meta-analysis. *Eur Arch Otorhinolaryngol* 268: 661–670.
- Stillebroer AB, Mulders PF, Boerman OC, Oyen WJ, Oosterwijk E (2010) Carbonic anhydrase IX in renal cell carcinoma: implications for prognosis, diagnosis, and therapy. *Eur Urol* 58: 75–83.
- Thorgeirsson SS, Grisham JW (2002) Molecular pathogenesis of human hepatocellular carcinoma. *Nat Genet* 31: 339–346.
- Shastri BS (2009) SNPs: impact on gene function and phenotype. *Methods Mol Biol* 578: 3–22.
- Chung CJ, Pu YS, Shiue HS, Lee HL, Lin P, et al. (2013) 4-(Methylnitrosamino)-1-(3-pyridyl)-1-butanone (NNK) metabolism-related enzymes gene polymorphisms, NNK metabolites levels and urothelial carcinoma. *Toxicol Lett* 216: 16–22.
- Safarinejad MR, Shafiei N, Safarinejad SH (2011) The association between bladder cancer and a single nucleotide polymorphism (rs2854744) in the insulin-like growth factor (IGF)-binding protein-3 (IGFBP-3) gene. *Arch Toxicol* 85: 1209–1218.
- Chung CJ, Pu YS, Su CT, Huang CY, Hsueh YM (2011) Gene polymorphisms of glutathione S-transferase omega 1 and 2, urinary arsenic methylation profile and urothelial carcinoma. *Sci Total Environ* 409: 465–470.
- Mittal RD, Gangwar R, Mandal RK, Srivastava P, Ahrwar DK (2012) Gene variants of XRCC4 and XRCC3 and their association with risk for urothelial bladder cancer. *Mol Biol Rep* 39: 1667–1675.
- Chen M, Hildebrandt MA, Clague J, Kamat AM, Picornell A, et al. (2010) Genetic variations in the sonic hedgehog pathway affect clinical outcomes in non-muscle-invasive bladder cancer. *Cancer Prev Res (Phila)* 3: 1235–1245.
- Andrew AS, Hu T, Gu J, Gui J, Ye Y, et al. (2012) HSD3B and gene-gene interactions in a pathway-based analysis of genetic susceptibility to bladder cancer. *PLoS One* 7: e51301.
- García-Closas M, Malats N, Silverman D, Dosemeci M, Kogevinas M, et al. (2005) NAT2 slow acetylation, GSTM1 null genotype, and risk of bladder cancer: results from the Spanish Bladder Cancer Study and meta-analyses. *Lancet* 366: 649–659.
- Wu CC, Huang YK, Chung CJ, Huang CY, Pu YS, et al. (2013) Polymorphism of inflammatory genes and arsenic methylation capacity are associated with urothelial carcinoma. *Toxicol Appl Pharmacol*.
- Sakano S, Wada T, Matsumoto H, Sugiyama S, Inoue R, et al. (2006) Single nucleotide polymorphisms in DNA repair genes might be prognostic factors in muscle-invasive bladder cancer patients treated with chemoradiotherapy. *Br J Cancer* 95: 561–570.
- Zegers MP, Tan FE, Dorant E, van Den Brandt PA (2000) The impact of characteristics of cigarette smoking on urinary tract cancer risk: a meta-analysis of epidemiologic studies. *Cancer* 89: 630–639.
